# Supplementary material for: Antibiofilm and antivirulence efficacy of myrtenol enhances the antibiotic susceptibility of Acinetobacter baumannii
Source: PubMed Central journal article supplement (PMC7738676; doi:10.1038/s41598-020-79128-x), 2020-12-15
Supplement: 41598_2020_79128_MOESM1_ESM.pdf [file 41598_2020_79128_MOESM1_ESM.pdf]

**Antibiofilm and antivirulence efficacy of myrtenol enhances the antibiotic susceptibility  
of *Acinetobacter baumannii***

Anthonymuthu Selvaraj<sup>1</sup>, Alaguvel Valliammai<sup>1</sup>, Ganesh kumar Sakthivel<sup>1</sup>, Manokaran Suba<sup>1</sup>, Chandran Sivasankar<sup>1,2</sup> and Shunmugiah Karutha Pandian<sup>1\*</sup>

<sup>1</sup>Department of Biotechnology, Alagappa University, Karaikudi, Tamil Nadu, India.

<sup>2</sup>Department of Food Science and Technology, Pondicherry University, Pondicherry, India.

**\*Corresponding Author**

Dr. Shunmugiah Karutha Pandian

Senior Professor and Head

Department of Biotechnology, Alagappa University, Karaikudi - 630 003, Tamil Nadu, India.

Mail ID: pandiansk@gmail.com

**Fax:** +91 4565 225202

**Tel:** +91 4565 225215

**Supplementary Table 1: MIC of antibiotics against AB strains**

| <b>Antibiotics</b>   | <b>MIC (<math>\mu\text{g/mL}</math>)</b> |                |                 |                 |
|----------------------|------------------------------------------|----------------|-----------------|-----------------|
|                      | <b>AB-ATCC</b>                           | <b>AB-MTCC</b> | <b>AB-A10-3</b> | <b>AB-A42-4</b> |
| <b>Amikacin</b>      | 64                                       | 64             | 64              | 64              |
| <b>Ciprofloxacin</b> | 6                                        | 4              | 4               | 6               |
| <b>Gentamicin</b>    | 125                                      | 32             | 32              | 64              |
| <b>Trimethoprim</b>  | 125                                      | 64             | 64              | 125             |

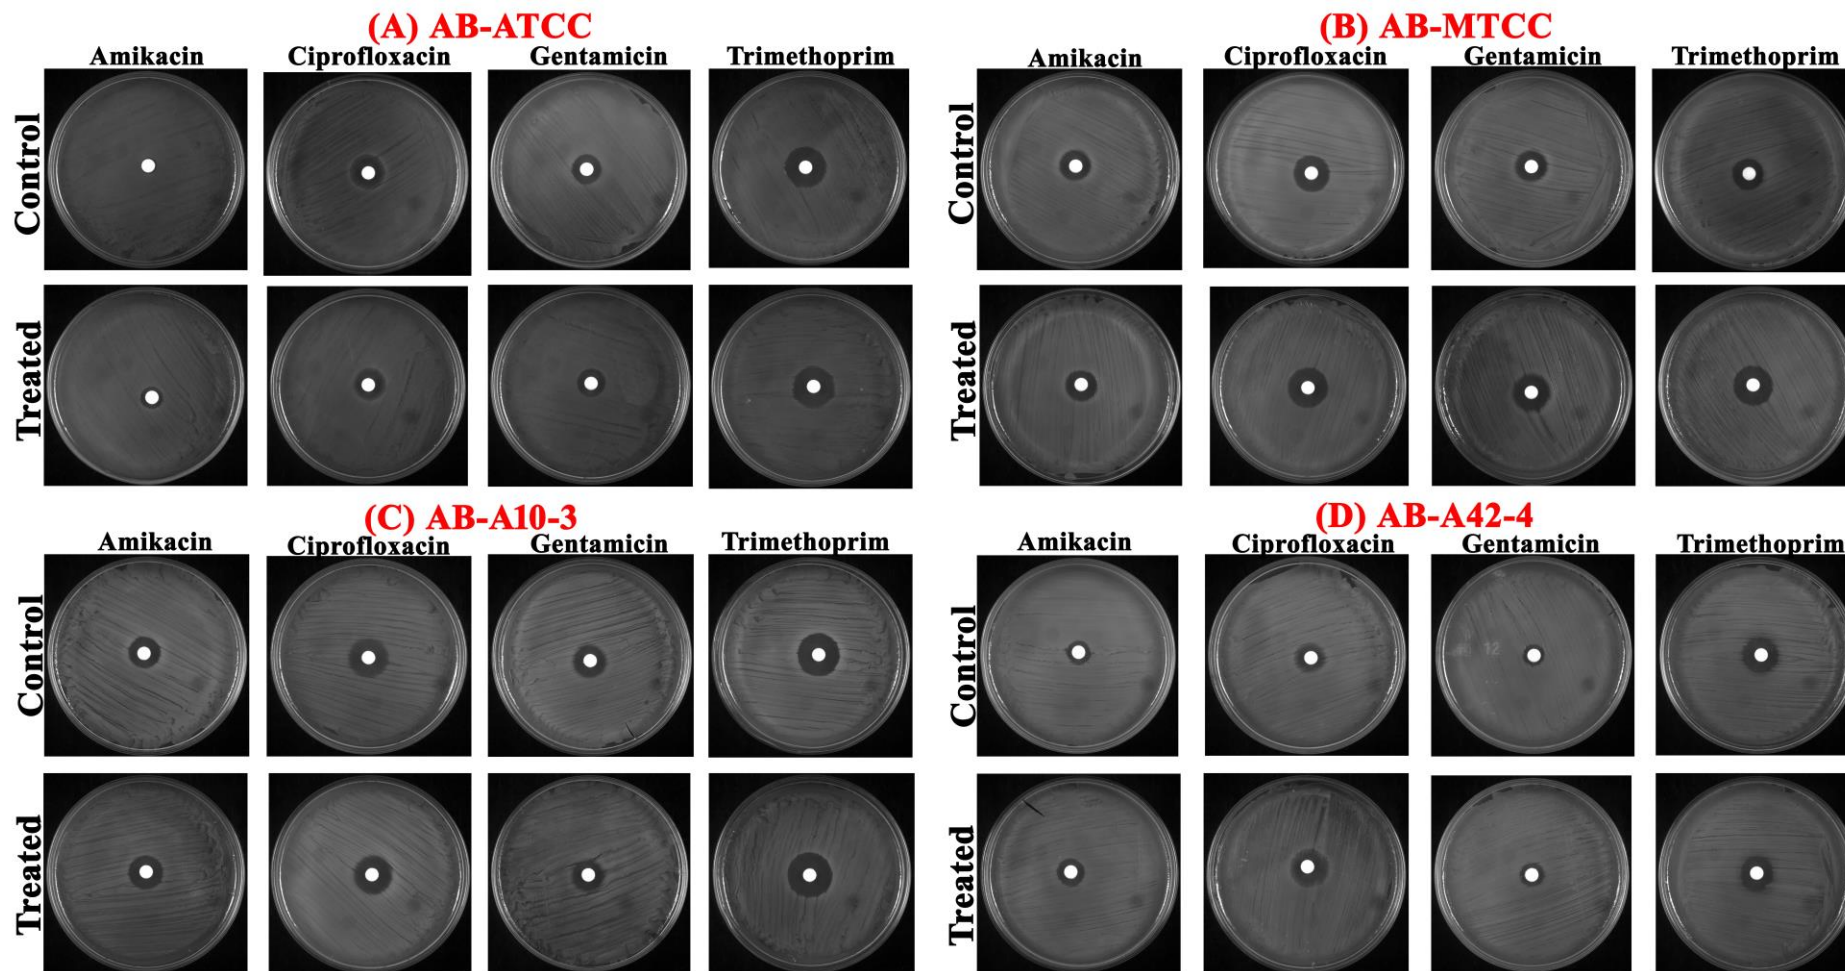

**Supplementary Fig. 1:** Effect of myrtenol at MBIC (200 µg/mL) on the susceptibility of AB strains to antibiotics. Disc diffusion plates showing the increased susceptibility of AB strains to antibiotics in the presence of myrtenol.
